# Supplementary material
Source: publisher site journal article supplement (https://www.dovepress.com/article/484542)

**Figure S1**

**Figure S1** Scatter plot analysis of the selected modules


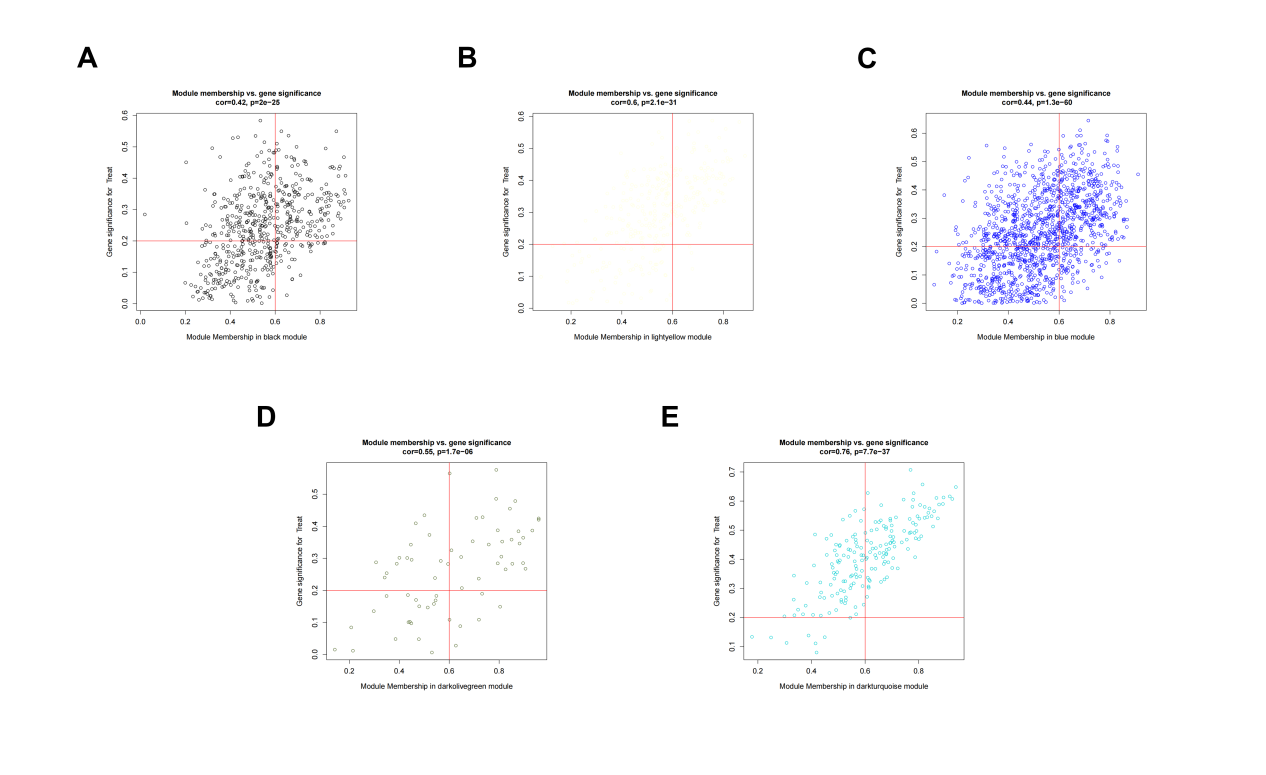


**(A–E)** Scatterplots of gene significance versus module membership showing 2380 key module genes related to asthma.

**Table S1** Primers used for real-time quantitative PCR


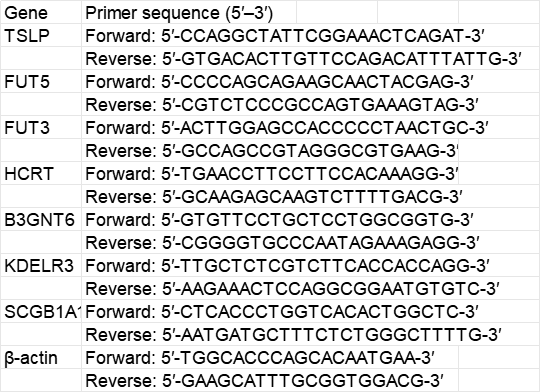


**Table S2** The clinical characteristics of the asthma patients


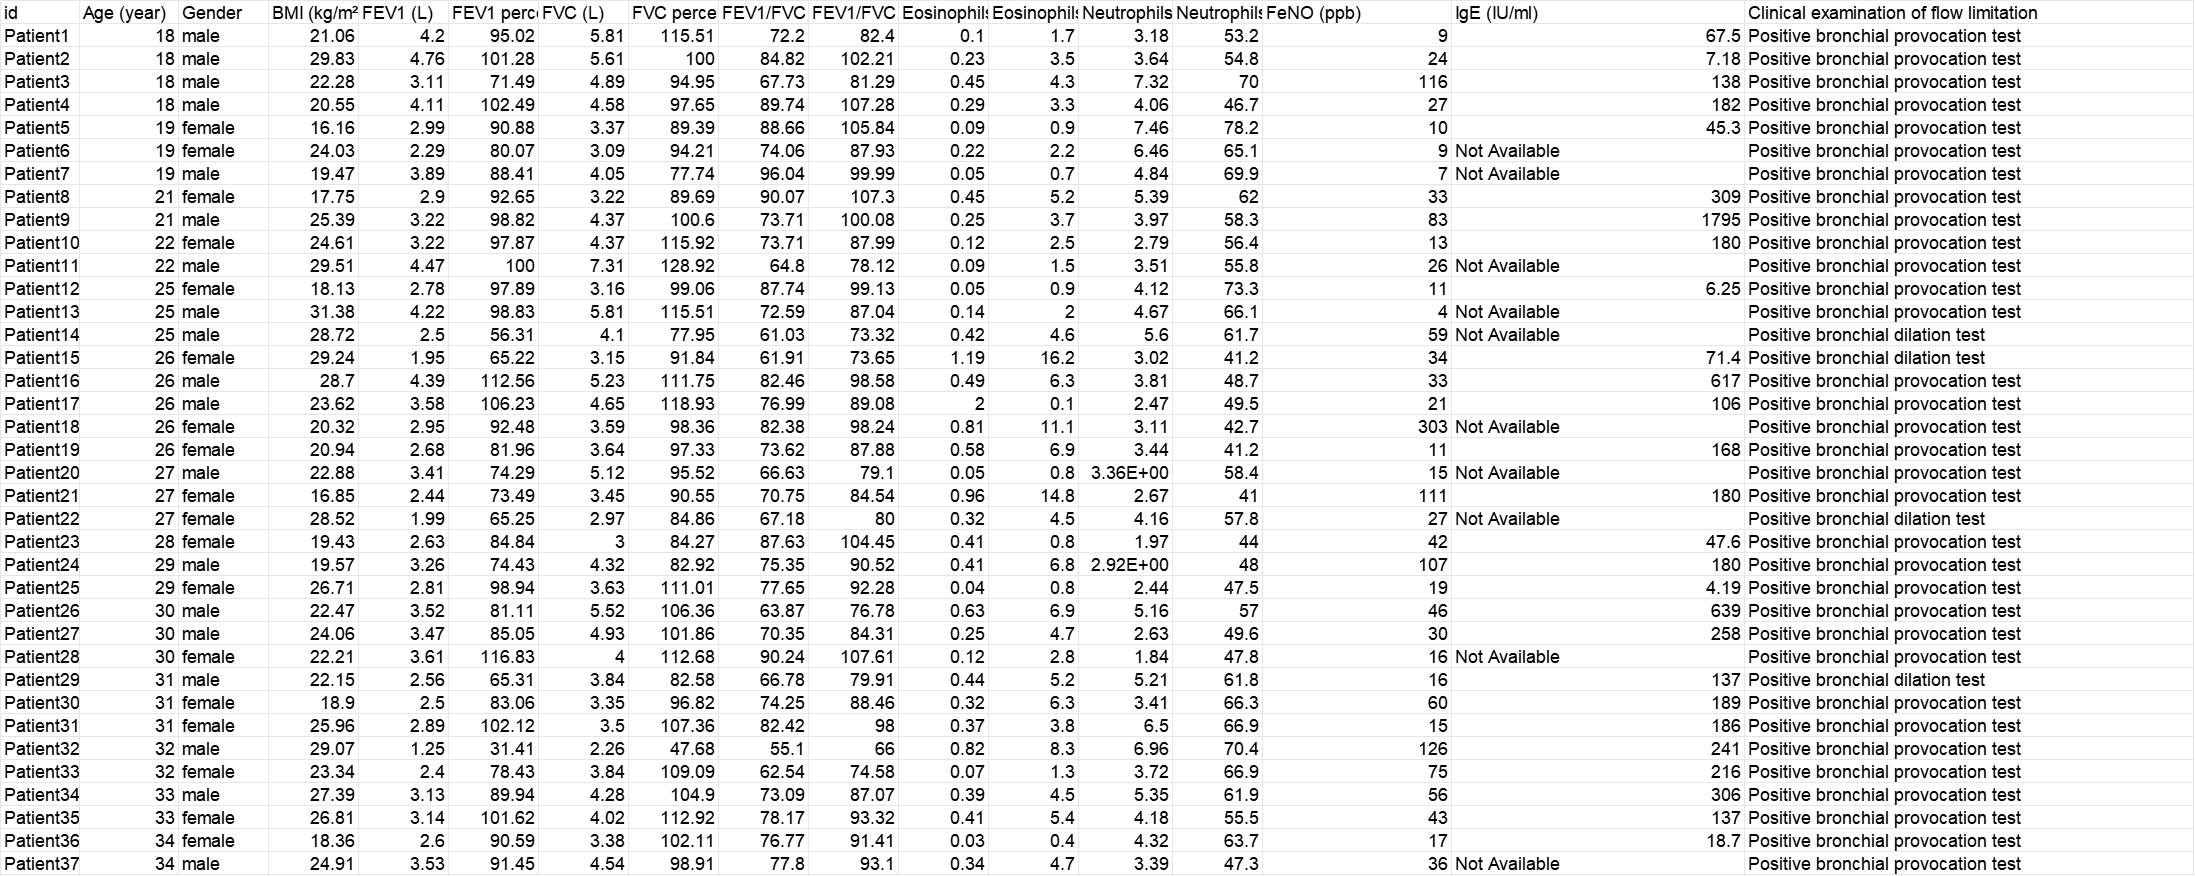


**Table S3** Differentially expressed genes of the GSE63142 dataset


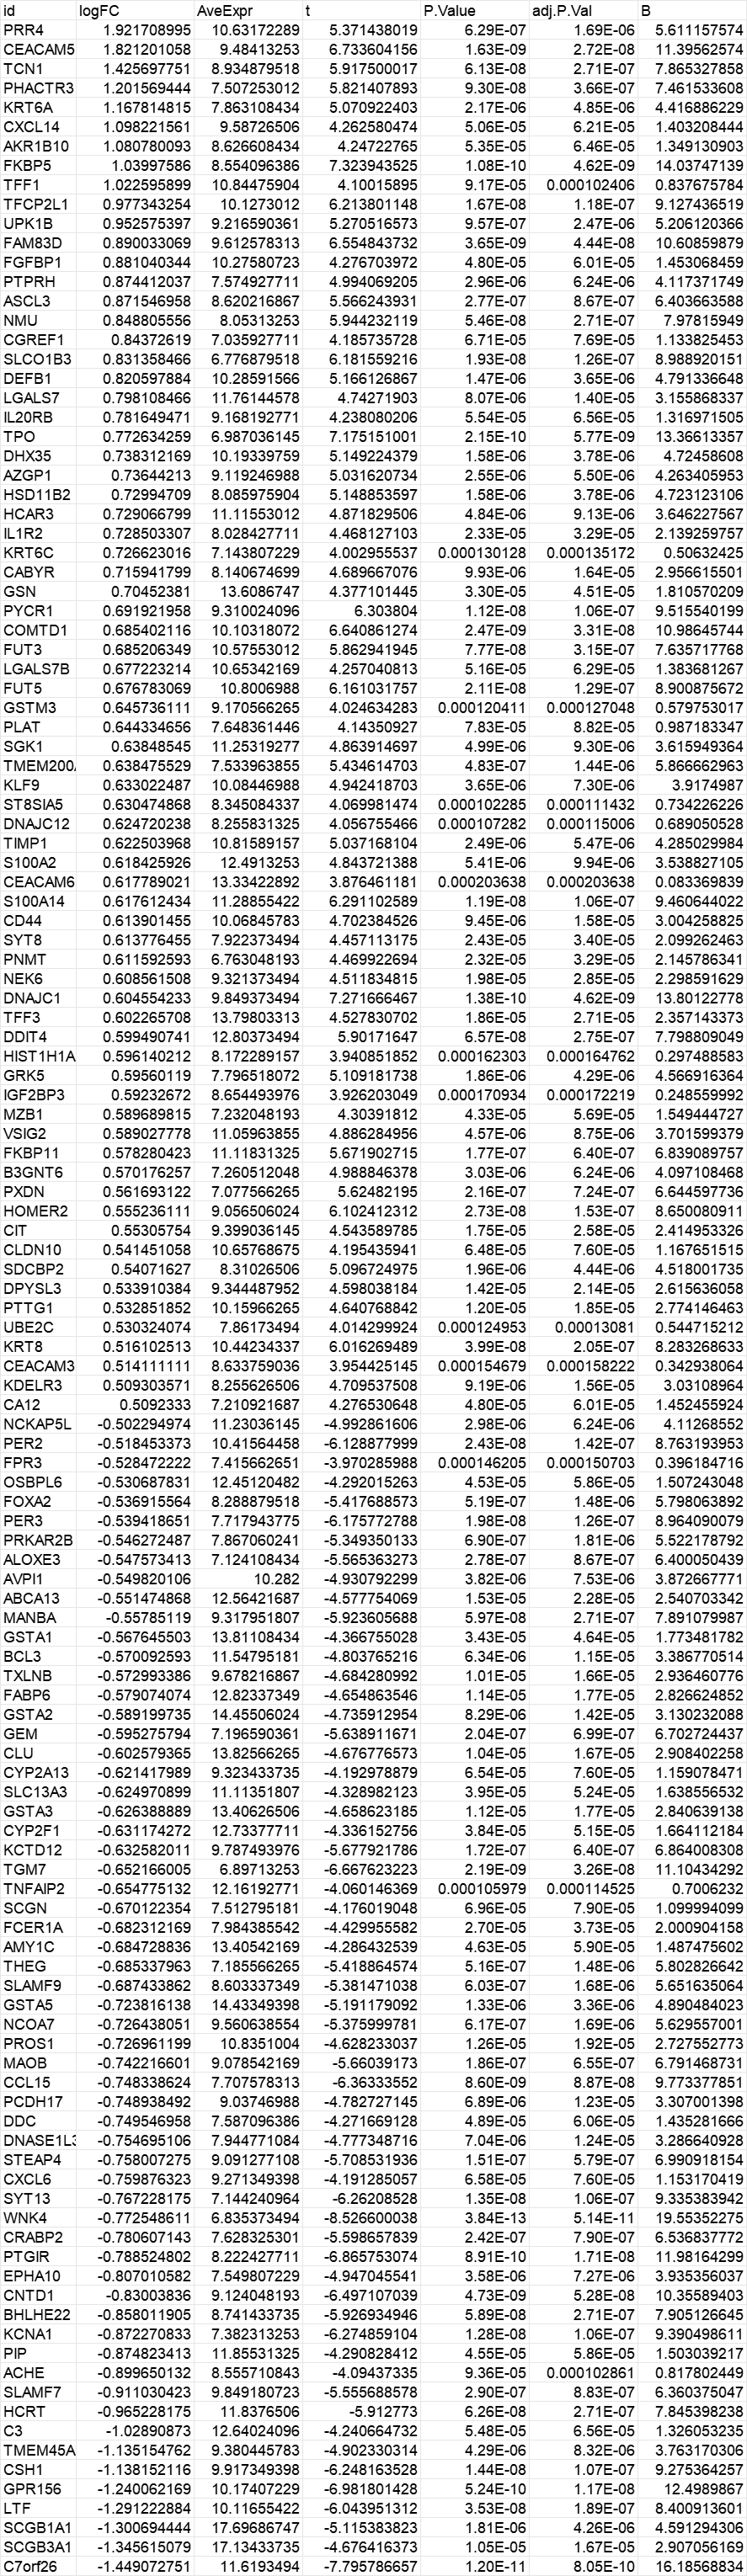


**Table S4** Key module genes related to asthma


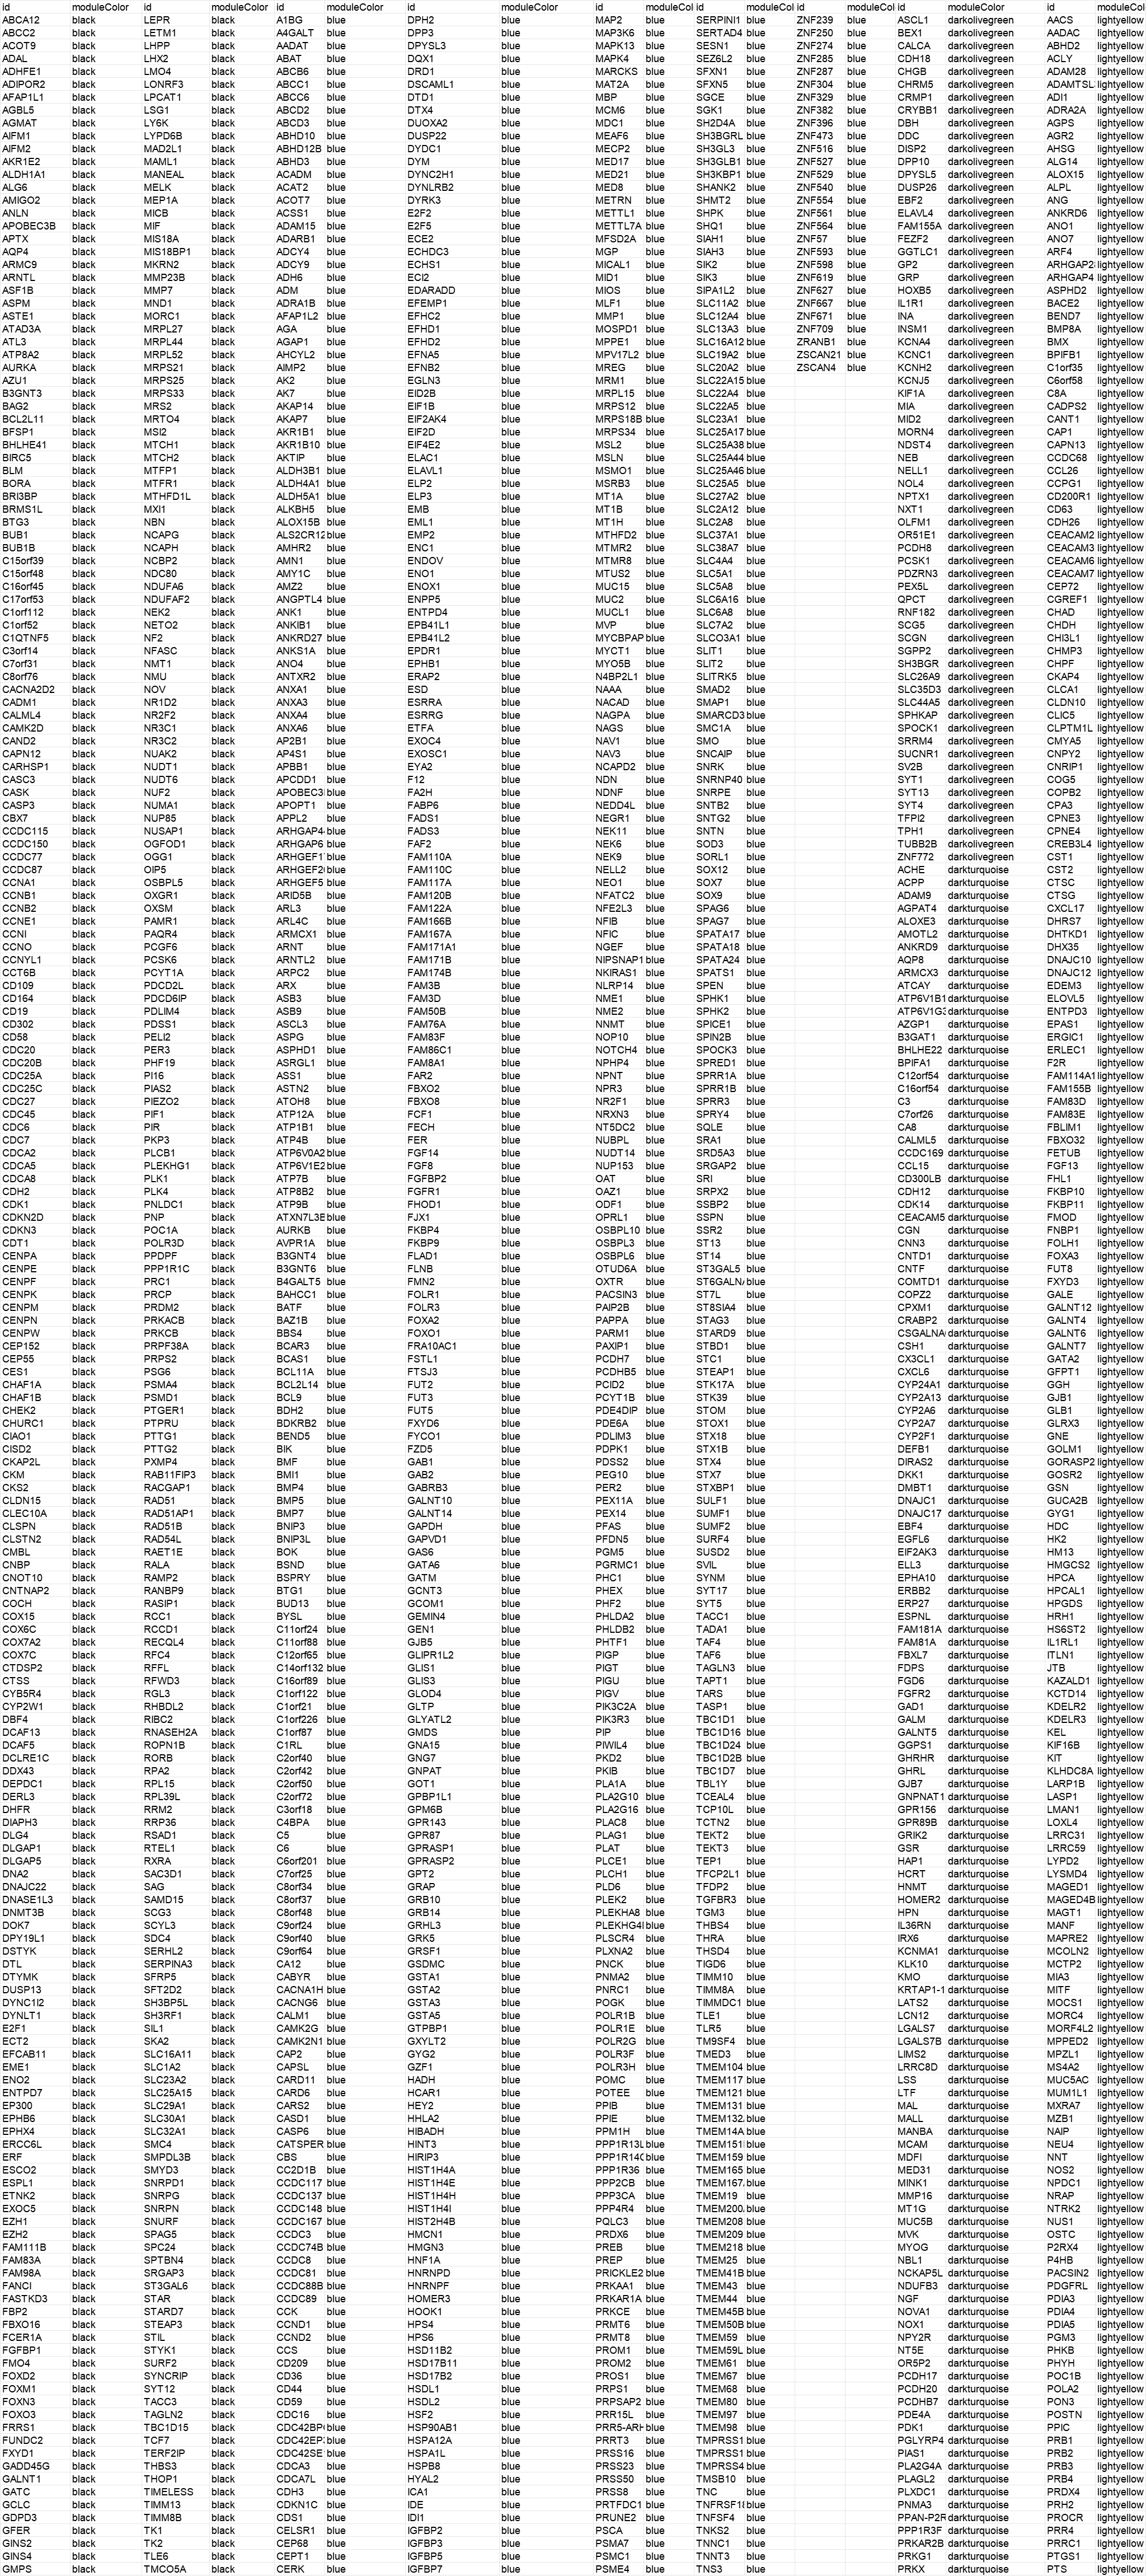


**Table S5** The transcription factors that may regulate key glycosylation-related genes


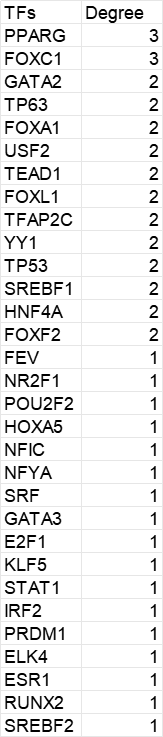


**Table S6** The proportion of immune infiltrating cells in the asthma immune microenvironment using the GSE63142 database


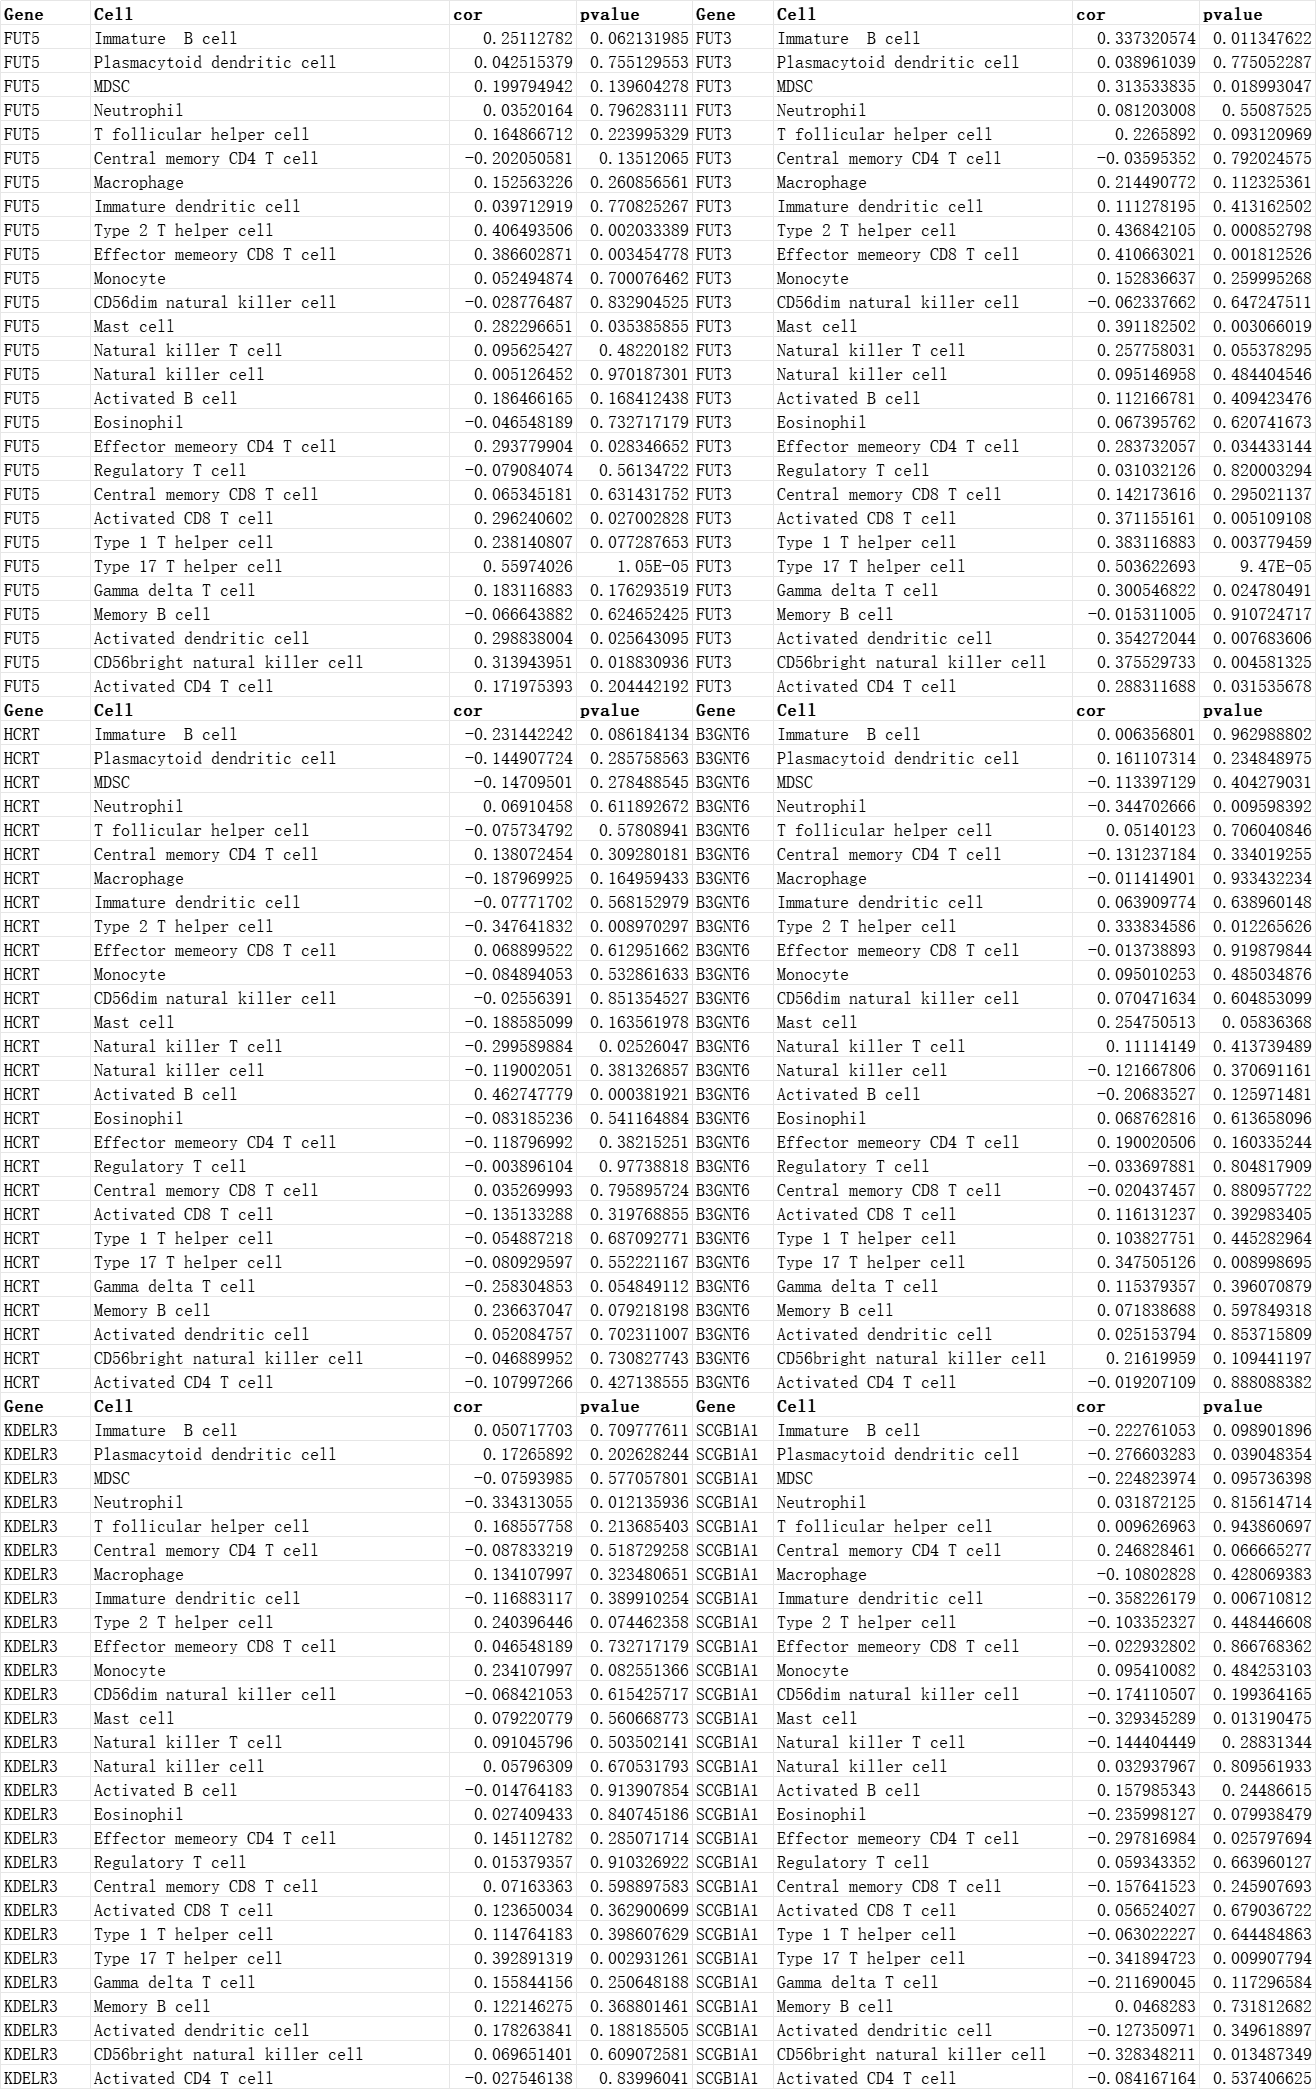

Supplement: Supplementary file 1 [file get_supplementary_file.php]
